# Supplementary material for: Unsaturated coordination modulation and enlarged pore size in nanoflower-like metal organic frameworks for enhanced lithium–oxygen battery performance
Source: Royal Society of Chemistry journal article supplement (doi:10.1039/d4ta06346e), 2024-01-01
Supplement: d4ta06346e1.pdf [file d4ta06346e1.pdf]

## Supporting Information

### Unsaturated coordination modulation and enlarged pore size in nanoflower-like metal organic frameworks for enhanced lithium-oxygen battery performance

Lingwen Zhao, Juanjuan Feng, Adeel Abbas, Hao Sun, Chunlei Wang, and Hongchao Wang\*

School of Physics, State Key Laboratory of Crystal Materials, Shandong University,  
Jinan, 250100, China

\*Corresponding authors: Hongchao Wang, E-mail: [wanghc@sdu.edu.cn](mailto:wanghc@sdu.edu.cn)

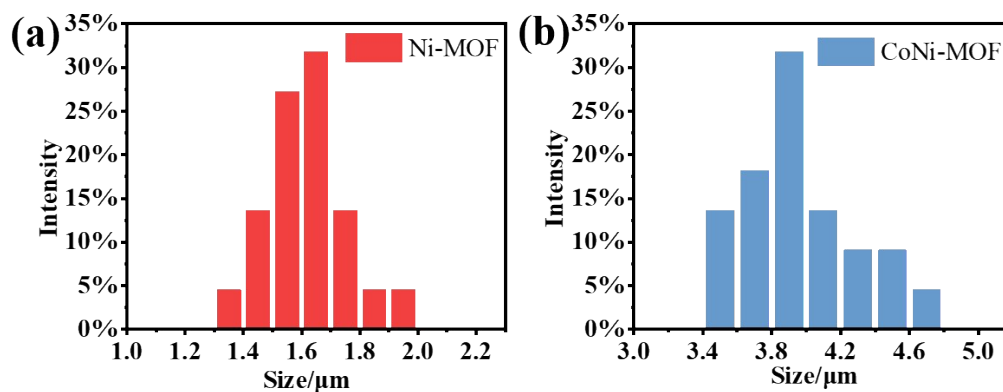

**Fig. S1** Particle Size Distribution of (a) Ni-MOF and (b) CoNi-MOF.

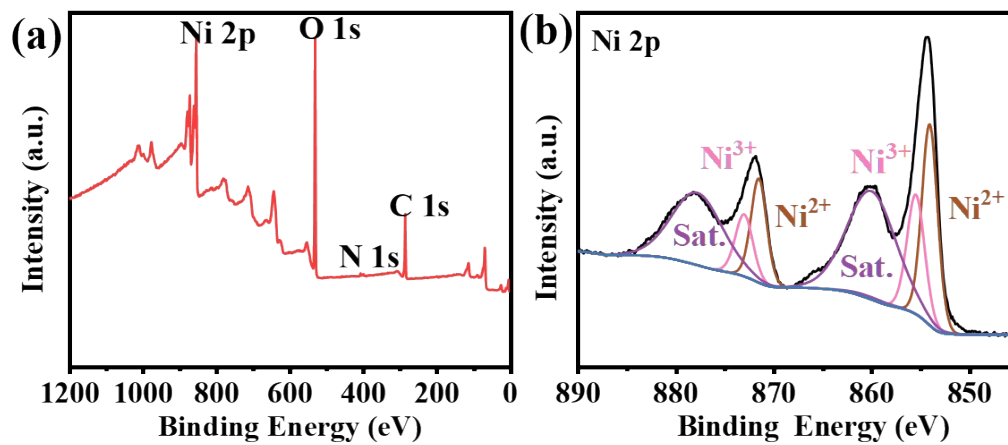

**Fig. S2** (a)XPS survey and (b) high-resolution XPS spectra of Ni 2p of Ni-MOF.

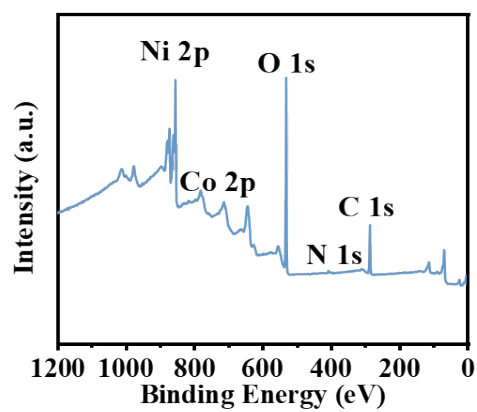

**Fig. S3** XPS survey of CoNi-MOF.

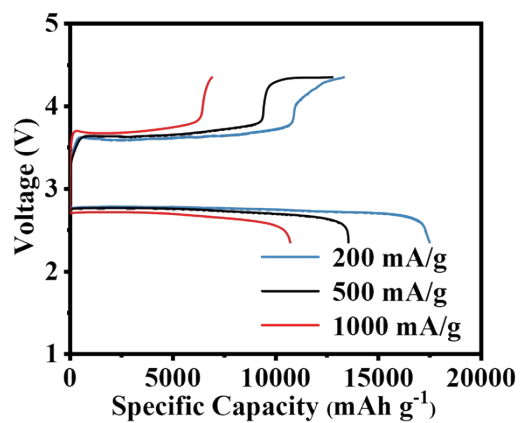

**Fig. S4** Discharge/charge curves of Ni-MOF cathode at different current densities.

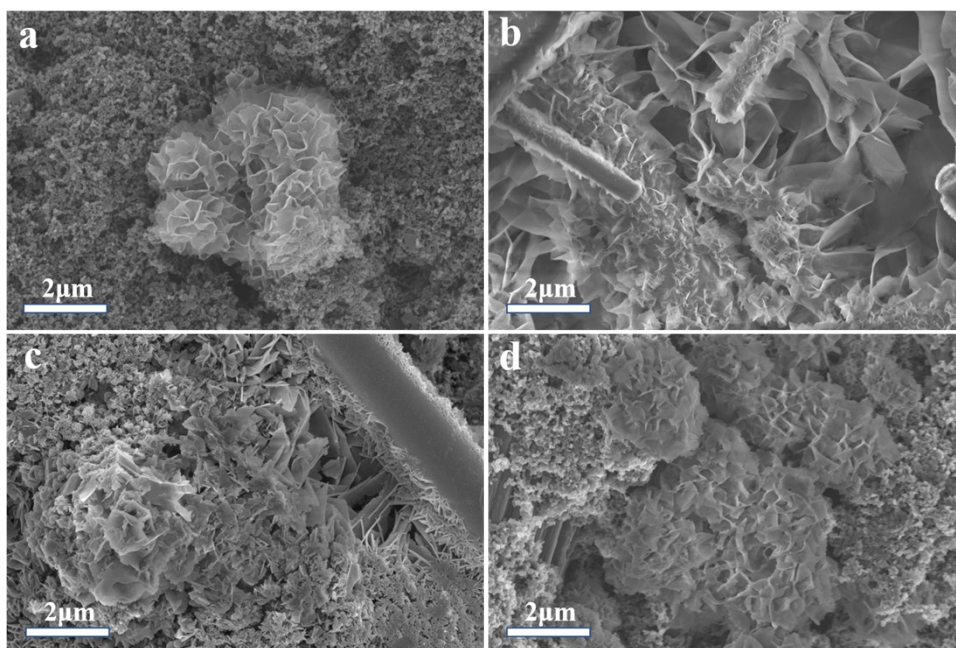

**Fig. S5** SEM images of the Ni-MOF cathodes: (a) fresh cathode, (b) discharge to 600 mAh g<sup>-1</sup>, (c) discharge to 2000 mAh g<sup>-1</sup> and (d) recharge to 2000 mAh g<sup>-1</sup>.

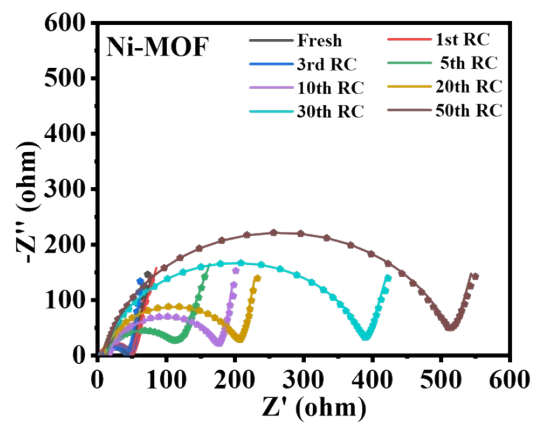

**Fig. S6** EIS spectra of Ni-MOF electrodes at different states.

**Table S1** ICP test results of CoNi-MOF.

| Sample   | Element | Sample element content | Sample element content |
|----------|---------|------------------------|------------------------|
|          |         | C <sub>x</sub> (mg/kg) | W (%)                  |
| CoNi-MOF | Co      | 66808.9                | 6.68                   |
|          | Ni      | 508563.7               | 50.86                  |

**Table S2** Oxidation states of Ni and Co ions in different states.

|           | Ni <sup>2+</sup> /% | Ni <sup>3+</sup> /% | Co <sup>2+</sup> /% | Co <sup>3+</sup> /% |
|-----------|---------------------|---------------------|---------------------|---------------------|
| State I   | 80.64               | 19.36               | 32.43               | 67.57               |
| State II  | 45.45               | 54.55               | 31.03               | 68.97               |
| State III | 39.17               | 60.83               | 54.64               | 45.36               |
| State IV  | 78.76               | 21.24               | 46.24               | 53.76               |



**Table S3.** Parameter values of the fitted equivalent circuit for Ni-MOF electrodes.

| States                     | $R_s$ ( $\Omega$ ) | $R_{ct}$ ( $\Omega$ ) | $CPE$<br>( $\Omega^{-1} \text{ cm}^{-2} \text{ s}^n$ ) | $Z_W$<br>( $\Omega^{-1} \text{ cm}^{-2} \text{ s}^{0.5}$ ) |
|----------------------------|--------------------|-----------------------|--------------------------------------------------------|------------------------------------------------------------|
| Pristine                   | 7.737              | 35.31                 | 0.91918                                                | 0.39973                                                    |
| 1 <sup>st</sup> charged    | 7.179              | 39.30                 | 0.92793                                                | 0.291                                                      |
| 3 <sup>rd</sup> Recharged  | 7.989              | 35.94                 | 0.88581                                                | 0.53135                                                    |
| 5 <sup>th</sup> Recharged  | 11.98              | 108.1                 | 0.86533                                                | 0.80959                                                    |
| 10 <sup>th</sup> Recharged | 16.64              | 164.8                 | 0.8798                                                 | 1.482                                                      |
| 20 <sup>th</sup> Recharged | 10.54              | 200.4                 | 0.91047                                                | 1.399                                                      |
| 30 <sup>th</sup> Recharged | 12.4               | 378.7                 | 0.91831                                                | 0.87578                                                    |
| 50 <sup>th</sup> Recharged | 12.32              | 536.4                 | 0.91525                                                | 2.715                                                      |

**Table S4.** Parameter values of the fitted equivalent circuit for CoNi-MOF electrodes.

| States                     | $R_s$ ( $\Omega$ ) | $R_{ct}$ ( $\Omega$ ) | $CPE$<br>( $\Omega^{-1} \text{ cm}^{-2} \text{ s}^n$ ) | $Z_W$<br>( $\Omega^{-1} \text{ cm}^{-2} \text{ s}^{0.5}$ ) |
|----------------------------|--------------------|-----------------------|--------------------------------------------------------|------------------------------------------------------------|
| Pristine                   | 8.284              | 30.21                 | 0.92134                                                | 0.61555                                                    |
| 1 <sup>st</sup> charged    | 7.779              | 30.86                 | 0.91892                                                | 0.27749                                                    |
| 3 <sup>rd</sup> Recharged  | 9.463              | 35.32                 | 0.89096                                                | 0.46002                                                    |
| 5 <sup>th</sup> Recharged  | 8.454              | 76.74                 | 0.85982                                                | 0.6523                                                     |
| 10 <sup>th</sup> Recharged | 12.06              | 103.7                 | 0.86964                                                | 0.81394                                                    |
| 20 <sup>th</sup> Recharged | 11.1               | 131.5                 | 0.89444                                                | 0.88721                                                    |
| 30 <sup>th</sup> Recharged | 10.26              | 195.2                 | 0.90619                                                | 1.26                                                       |
| 50 <sup>th</sup> Recharged | 13.81              | 230.2                 | 0.9152                                                 | 1.721                                                      |
